# Supplementary material for: Feature Selection and mRNA-miRNA bipartite Network Analysis for Biomarker Development and Drug Repurposing in Colon Cancer
Source: Research Square preprint supplement (doi:10.21203/rs.3.rs-2210142/v1), 2024-02-16
Supplement: Supplementary file 1 [file c29a69b70890c8b75e23373b.docx]

Feature Selection and mRNA-miRNA bipartite Network Analysis for Biomarker Development and Drug Repurposing in Colon Cancer

**Parisima Ghaffarian Zavarzadeh1, Zahra Abedi1, Amirreza Abbasi2, Habib MotieGhader2,3*, Ali Masoudi-Nejad1***

1. Laboratory of Systems Biology and Bioinformatics (LBB), Institute of Biochemistry and Biophysics, University of Tehran, Tehran, Iran.
2. Department of Biology, Tabriz Branch, Islamic Azad University, Tabriz, Iran.
3. Department of Health Ecosystem, Medical Faculty, Nisantasi University, Istanbul, Turkey.

***Corresponding Author**

| Habib MotieGhader, Ph.D.  Department of Biology, Tabriz Branch, Islamic Azad University, Tabriz, Iran.  E-mail: habib_moti@ut.ac.ir | Ali Masoudi-Nejad, Ph.D.  Laboratory of Systems Biology and Bioinformatics (LBB)  Institute of Biochemistry and Biophysics  University of Tehran, Tehran, Iran.  E-mail: [amasoudin@ut.ac.ir](mailto:amasoudin@ut.ac.ir)  WWW: <http://LBB.ut.ac.ir> |
| --- | --- |

**Table S1.** Enrichment analysis of genes in green-yellow module

| **Reactome pathway** | **Count** | ***p*-value** | **Genes** |
| --- | --- | --- | --- |
| Signaling by TGFB family members | 6 | 0.011515 | RBL1, ACVR1C, LTBP4, PMEPA1, SMAD5, ACVR2A |
| RIP-mediated NFkB activation via ZBP1 | 3 | 0.015904 | NFKBIA, RIPK3, TICAM1 |
| Interleukin-10 signaling | 4 | 0.016616 | IL1A, IL10RB, CCL20, CCR2 |
| SARS-CoV-2 modulates host translation machinery | 4 | 0.019594 | RPS5, GEMIN4, SNRPG, RPS21 |
| ZBP1(DAI) mediated induction of type I IFNs | 3 | 0.023837 | NFKBIA, RIPK3, TICAM1 |
| Galactose catabolism | 2 | 0.05614 | PGM2, GALK1 |
| G1/S Transition | 5 | 0.064009 | RBL1, PSMD14, MAX, CDK4, CDC7 |
| TLR3-mediated TICAM1-dependent programmed cell death | 2 | 0.066987 | RIPK3, TICAM1 |
| Mitochondrial Fatty Acid Beta-Oxidation | 3 | 0.067173 | HADHB, ACBD6, THEM4 |
| Clathrin-mediated endocytosis | 5 | 0.087342 | ITSN1, AAK1, M6PR, CLTB, PACSIN3 |
| EPH-Ephrin signaling | 4 | 0.08919 | ITSN1, CLTB, EFNA5, MYL12B |
| Mitotic G1 phase and G1/S transition | 5 | 0.092445 | RBL1, PSMD14, MAX, CDK4, CDC7 |

**Table S2.** Enrichment analysis of genes in lightcyan module

| **Reactome pathway** | **Count** | ***p*-value** | **Genes** |
| --- | --- | --- | --- |
| Cell Cycle Checkpoints | 14 | 0.018918 | PSMD12, NUP107, RMI1, PPP2R5A, NDC80, SKA1, KIF18A, PSMA3, CCNB1, CCNE2, MCM3, KIF2C, NBN, ATR |
| Disorders of transmembrane transporters | 10 | 0.0213 | PSMA3, PSMD12, NUP107, SLC35A3, HEPH, KCNJ11, DERL3, SLCO2A1, NUP62, SLC11A2 |
| Adaptive Immune System | 27 | 0.032956 | PSMD12, PIK3CD, RNF19B, TREM1, CD3D, KIR2DL4, CTSS, KIF3A, PLCG2, LAIR2, CD14, HERC6, HUWE1, PPP2R5A, AP2B1, FBXO32, HLA-F, DNM2, KIF18A, PSMA3, KBTBD6, ASB9, ORAI2, BTK, BLMH, KIF2C, TLR2 |
| Activated NOTCH1 Transmits Signal to the Nucleus | 4 | 0.034232 | NEURL1B, NOTCH1, CNTN1, DTX4 |
| Antigen processing-Cross presentation | 7 | 0.034985 | PSMA3, PSMD12, BTK, CD14, HLA-F, CTSS, TLR2 |
| Antigen activates B Cell Receptor (BCR) leading to generation of second messengers | 4 | 0.037146 | ORAI2, BTK, PLCG2, PIK3CD |
| Mitotic Anaphase | 11 | 0.048058 | PSMA3, PSMD12, KIF18A, CCNB1, NUP107, ESPL1, NUP62, PPP2R5A, KIF2C, NDC80, SKA1 |
| Mitotic Metaphase and Anaphase | 11 | 0.049313 | PSMA3, PSMD12, KIF18A, CCNB1, NUP107, ESPL1, NUP62, PPP2R5A, KIF2C, NDC80, SKA1 |
| Cell Cycle | 24 | 0.051044 | PLK4, PSMD12, NUP107, RMI1, GINS4, HAUS3, PPP2R5A, MND1, TYMS, MASTL, NDC80, SKA1, KIF18A, PSMA3, CCNB1, ESPL1, CCNE2, POLD2, NUP62, MCM3, KIF2C, NBN, NCAPD3, ATR |
| ER-Phagosome pathway | 6 | 0.057598 | PSMA3, PSMD12, BTK, CD14, HLA-F, TLR2 |
| MyD88 deficiency (TLR2/4) | 3 | 0.057813 | BTK, CD14, TLR2 |
| Cell Cycle, Mitotic | 20 | 0.061494 | PLK4, PSMD12, NUP107, GINS4, HAUS3, PPP2R5A, TYMS, MASTL, NDC80, SKA1, KIF18A, PSMA3, CCNB1, ESPL1, CCNE2, POLD2, NUP62, MCM3, KIF2C, NCAPD3 |
| IRAK4 deficiency (TLR2/4) | 3 | 0.064072 | BTK, CD14, TLR2 |
| Amplification of signal from unattached kinetochores via a MAD2 inhibitory signal | 6 | 0.071853 | KIF18A, NUP107, PPP2R5A, KIF2C, NDC80, SKA1 |
| Amplification of signal from the kinetochores | 6 | 0.071853 | KIF18A, NUP107, PPP2R5A, KIF2C, NDC80, SKA1 |
| Resolution of Sister Chromatid Cohesion | 7 | 0.072384 | KIF18A, CCNB1, NUP107, PPP2R5A, KIF2C, NDC80, SKA1 |
| Separation of Sister Chromatids | 9 | 0.076286 | PSMA3, PSMD12, KIF18A, NUP107, ESPL1, PPP2R5A, KIF2C, NDC80, SKA1 |
| SLC transporter disorders | 6 | 0.076998 | NUP107, SLC35A3, HEPH, SLCO2A1, NUP62, SLC11A2 |
| Signaling by Rho GTPases | 23 | 0.096079 | GRB7, GIT2, ABCD3, NUP107, ARHGEF16, LIMK1, KIF14, PPP2R5A, ARHGAP17, TNFAIP1, IQGAP3, NDC80, SKA1, DOCK10, STIP1, KIF18A, OBSCN, EFHD2, BTK, TAX1BP3, KIF2C, HNRNPC, YKT6 |
| Cargo recognition for clathrin-mediated endocytosis | 6 | 0.099495 | AGTR1, UBQLN1, COPS7B, AP2B1, CD3D, SLC2A8 |

**Table S3.** Enrichment analysis of genes in midnight blue module

| **Reactome pathway** | **Count** | ***p*-value** | **Genes** |
| --- | --- | --- | --- |
| Extension of Telomeres | 6 | 6.69E-05 | POLA1, POLD1, RPA3, GAR1, POT1, CHTF18 |
| Telomere C-strand (Lagging Strand) Synthesis | 5 | 1.83E-04 | POLA1, POLD1, RPA3, POT1, CHTF18 |
| Cell Cycle | 17 | 2.01E-04 | CENPW, HSP90AB1, PLK1, PPP2R3B, HMMR, BRCA2, CHTF18, POLA1, CENPF, PSMB4, RPA3, POLD1, GAR1, POT1, NUP98, E2F4, MNAT1 |
| Chromosome Maintenance | 7 | 0.001217 | POLA1, CENPW, POLD1, RPA3, GAR1, POT1, CHTF18 |
| Polymerase switching on the C-strand of the telomere | 4 | 0.001321 | POLA1, POLD1, POT1, CHTF18 |
| Telomere Maintenance | 6 | 0.002651 | POLA1, POLD1, RPA3, GAR1, POT1, CHTF18 |
| G1/S Transition | 6 | 0.004993 | POLA1, PSMB4, RPA3, PPP2R3B, E2F4, MNAT1 |
| Cellular responses to stress | 15 | 0.0059 | HSP90AB1, EHMT2, AQP8, RPL12, HSP90B1, PSMB4, RPA3, EXOSC9, EXOSC8, POT1, HYOU1, NUP98, PPARA, PPARGC1A, RPL39 |
| rRNA processing in the nucleus and cytosol | 7 | 0.005958 | EXOSC9, RPL12, EXOSC8, GAR1, NOL11, RPL39, DCAF13 |
| Removal of the Flap Intermediate | 3 | 0.006022 | POLA1, POLD1, RPA3 |
| G2/M Transition | 7 | 0.006257 | CENPF, PSMB4, HSP90AB1, PLK1, PPP2R3B, HMMR, MNAT1 |
| Mitotic G2-G2/M phases | 7 | 0.006567 | CENPF, PSMB4, HSP90AB1, PLK1, PPP2R3B, HMMR, MNAT1 |
| Cellular responses to stimuli | 15 | 0.006874 | HSP90AB1, EHMT2, AQP8, RPL12, HSP90B1, PSMB4, RPA3, EXOSC9, EXOSC8, POT1, HYOU1, NUP98, PPARA, PPARGC1A, RPL39 |
| Processive synthesis on the lagging strand | 3 | 0.006911 | POLA1, POLD1, RPA3 |
| Cell Cycle, Mitotic | 12 | 0.007523 | POLA1, CENPF, PSMB4, HSP90AB1, POLD1, RPA3, PLK1, PPP2R3B, NUP98, E2F4, HMMR, MNAT1 |
| rRNA processing | 7 | 0.007564 | EXOSC9, RPL12, EXOSC8, GAR1, NOL11, RPL39, DCAF13 |
| Mitotic G1 phase and G1/S transition | 6 | 0.008526 | POLA1, PSMB4, RPA3, PPP2R3B, E2F4, MNAT1 |
| Removal of the Flap Intermediate from the C-strand | 3 | 0.008854 | POLD1, RPA3, POT1 |
| Processive synthesis on the C-strand of the telomere | 3 | 0.011011 | POLD1, RPA3, POT1 |
| Lagging Strand Synthesis | 3 | 0.012168 | POLA1, POLD1, RPA3 |
| S Phase | 6 | 0.01226 | POLA1, PSMB4, POLD1, RPA3, E2F4, MNAT1 |
| Metabolism | 28 | 0.014381 | SLC35B2, HSP90AB1, ADH1B, RPL12, SLC35D2, HMMR, SDSL, NUDT4, CA1, PSMB4, SMPD4, POLD1, HYAL2, FPGS, GPC4, PPARGC1A, RPL39, ACADS, NADK, GPT2, CYP2C9, MTHFD1, AGPS, NDUFAF2, NUP98, PPARA, SERINC2, CD320 |
| Gap-filling DNA repair synthesis and ligation in TC-NER | 4 | 0.017515 | POLD1, RPA3, XRCC1, MNAT1 |
| Gap-filling DNA repair synthesis and ligation in GG-NER | 3 | 0.018695 | POLD1, RPA3, XRCC1 |
| Cyclin A/B1/B2 associated events during G2/M transition | 3 | 0.018695 | PLK1, PPP2R3B, MNAT1 |
| Major pathway of rRNA processing in the nucleolus and cytosol | 6 | 0.019734 | EXOSC9, RPL12, EXOSC8, NOL11, RPL39, DCAF13 |
| Glycosaminoglycan metabolism | 5 | 0.020801 | SLC35B2, HYAL2, SLC35D2, HMMR, GPC4 |
| Transcription-Coupled Nucleotide Excision Repair (TC-NER) | 4 | 0.029154 | POLD1, RPA3, XRCC1, MNAT1 |
| DNA strand elongation | 3 | 0.029754 | POLA1, POLD1, RPA3 |
| Global Genome Nucleotide Excision Repair (GG-NER) | 4 | 0.034094 | POLD1, RPA3, XRCC1, MNAT1 |
| Resolution of Abasic Sites (AP sites) | 3 | 0.042799 | POLD1, RPA3, XRCC1 |
| Base Excision Repair | 4 | 0.042842 | POLD1, RPA3, POT1, XRCC1 |
| Unfolded Protein Response (UPR) | 4 | 0.045188 | EXOSC9, EXOSC8, HYOU1, HSP90B1 |
| Cyclin D associated events in G1 | 3 | 0.059803 | PPP2R3B, E2F4, MNAT1 |
| G1 Phase | 3 | 0.059803 | PPP2R3B, E2F4, MNAT1 |
| Nucleotide Excision Repair | 4 | 0.06761 | POLD1, RPA3, XRCC1, MNAT1 |
| Transport of nucleotide sugars | 2 | 0.073592 | SLC35B2, SLC35D2 |
| Metabolism of vitamins and cofactors | 5 | 0.077155 | MTHFD1, FPGS, GPC4, NADK, CD320 |
| Synthesis of DNA | 4 | 0.082755 | POLA1, PSMB4, POLD1, RPA3 |
| Transport of small molecules | 11 | 0.087385 | SLC35B2, SLC6A6, CA1, PSMB4, WNK1, AQP8, SLC35D2, SLC39A6, ANO10, VLDLR, CLCA4 |
| Metabolism of water-soluble vitamins and cofactors | 4 | 0.087561 | MTHFD1, FPGS, NADK, CD320 |
| rRNA modification in the nucleus and cytosol | 3 | 0.093941 | GAR1, NOL11, DCAF13 |
| Axon guidance | 9 | 0.094573 | PSMB4, HSP90AB1, RPL12, SEMA6D, SEMA3E, VLDLR, SCN3B, RPL39, SCN4B |
| Hyaluronan uptake and degradation | 2 | 0.096912 | HYAL2, HMMR |
| HDR through MMEJ (alt-NHEJ) | 2 | 0.096912 | XRCC1, BRCA2 |
| HSF1 activation | 2 | 0.096912 | HSP90AB1, RPA3 |

**Table S4.** Enrichment analysis of biological process of genes in green-yellow module

| **Biological process** | **Count** | ***p*-value** | **Genes** |
| --- | --- | --- | --- |
| protein deubiquitination | 6 | 0.002852 | PSMD14, STAMBPL1, USP10, USP1, USP30, UCHL3 |
| female pregnancy | 5 | 0.010805 | OVGP1, STS, CAPN2, ADRA2A, PGF |
| acute inflammatory response | 3 | 0.012276 | B4GALT1, EIF2AK1, ADRA2A |
| defense response to virus | 7 | 0.017749 | RIPK3, IL10RB, NDUFAF4, DHX58, PMAIP1, TICAM1, TRIM34 |
| positive regulation of cholesterol efflux | 3 | 0.024053 | NFKBIA, RXRA, ABCG1 |
| NMDA selective glutamate receptor signaling pathway | 2 | 0.02656 | SULT1A4, SULT1A3 |
| response to organic substance | 3 | 0.027501 | SERPINF2, HPSE, ABCG1 |
| Gpositive regulation of G2/M transition of mitotic cell cycle | 3 | 0.027501 | CDK4, CDC7, DBF4B |
| protein peptidyl-prolyl isomerization | 3 | 0.034948 | FKBP11, FKBP1B, PPIL3 |
| regulation of actin cytoskeleton organization | 4 | 0.037126 | IL1A, IQGAP2, EFNA5, RHOBTB1 |
| cholesterol metabolic process | 4 | 0.037126 | LIMA1, RXRA, INSIG2, ABCG1 |
| replication fork processing | 3 | 0.03893 | BLM, RTEL1, TRAIP |
| memory | 4 | 0.043041 | YTHDF1, CNR1, PLCB1, KLK8 |
| cellular response to ionomycin | 2 | 0.043875 | CDK4, PLCB1 |
| cytokine-mediated signaling pathway | 5 | 0.051518 | IL1A, IL10RB, IL11RA, LILRB5, CCR2 |
| 'de novo' IMP biosynthetic process | 2 | 0.052418 | ATIC, PAICS |
| positive regulation of nuclear cell cycle DNA replication | 2 | 0.052418 | CDC7, DBF4B |
| interleukin-15-mediated signaling pathway | 2 | 0.052418 | IL15, PLCB1 |
| positive regulation of cell proliferation | 10 | 0.058408 | IL15, IL11RA, CDK4, NDUFAF4, OSM, AQP11, CDC7, DBF4B, ADRA2A, PGF |
| macrophage migration | 2 | 0.060884 | B4GALT1, CCR2 |
| 'de novo' XMP biosynthetic process | 2 | 0.060884 | ATIC, PAICS |
| animal organ regeneration | 3 | 0.061159 | ATIC, CDK4, PGF |
| flavonoid metabolic process | 2 | 0.069276 | SULT1A4, SULT1A3 |
| 'de novo' AMP biosynthetic process | 2 | 0.069276 | ATIC, PAICS |
| negative regulation of plasminogen activation | 2 | 0.069276 | SERPINE2, SERPINF2 |
| positive regulation of cell division | 3 | 0.071008 | IL1A, OSM, PGF |
| immune response | 9 | 0.074651 | IL1A, IL15, IL10RB, RAET1G, CCL20, OSM, RAET1L, ULBP2, CCR2 |
| positive regulation of inflammatory response | 4 | 0.075762 | NFKBIA, IL15, OSM, CCR2 |
| calcineurin-mediated signaling | 2 | 0.077593 | SULT1A4, SULT1A3 |
| GMP biosynthetic process | 2 | 0.077593 | ATIC, PAICS |
| regulation of nitric-oxide synthase activity | 2 | 0.077593 | IL1A, ACVR2A |
| galactose metabolic process | 2 | 0.077593 | B4GALT1, GALK1 |
| dopamine catabolic process | 2 | 0.077593 | SULT1A4, SULT1A3 |
| positive regulation of protein secretion | 3 | 0.078708 | IL1A, KCNN4, ABCG1 |
| protein phosphorylation | 9 | 0.080924 | RPS6KL1, ACVR1C, CDK4, AAK1, BMP2K, SMAD5, PRKG1, ACVR2A, CSNK1G2 |
| steroid metabolic process | 3 | 0.081331 | SULT1A4, SULT1A3, DHRS4 |
| endonucleolytic cleavage in ITS1 to separate SSU-rRNA from 5.8S rRNA and LSU-rRNA from tricistronic rRNA transcript (SSU-rRNA, 5.8S rRNA, LSU-rRNA) | 2 | 0.085836 | KRI1, RPS21 |
| negative regulation of insulin secretion involved in cellular response to glucose stimulus | 2 | 0.085836 | FKBP1B, ADRA2A |
| immune system process | 3 | 0.089357 | YTHDF1, RAET1L, KCNN4 |
| positive regulation of I-kappaB kinase/NF-kappaB signaling | 5 | 0.093538 | IL1A, SLC20A1, TICAM1, TMEM9B, TRIM34 |
| angiogenesis involved in wound healing | 2 | 0.094006 | B4GALT1, HPSE |
| regulation of clathrin-dependent endocytosis | 2 | 0.094006 | AAK1, BMP2K |
| cellular response to growth factor stimulus | 3 | 0.094832 | ACVR1C, FEZ1, ACVR2A |
| cellular response to lipopolysaccharide | 5 | 0.094916 | HADHB, IL1A, CDK4, CAPN2, TICAM1 |
| protein transport | 8 | 0.09929 | MYO1D, SNX25, ITSN1, TMEM9, SNX30, SNX8, COPZ1, YIF1B |

**Table S5.** Enrichment analysis of biological process of genes in lightcyan module

| **Biological process** | **Count** | ***p*-value** | **Genes** |
| --- | --- | --- | --- |
| signal transduction | 43 | 4.23E-04 | BCAR3, GRB7, LTK, ENPEP, DGKA, SH2D2A, CTNND2, RTKN2, TGFBRAP1, ADCY3, PIK3CD, ARHGAP17, CSF2RB, SHB, IQGAP3, KIR2DL4, CNGA3, NAE1, MAGI1, CAP1, NMB, CRADD, DAPK1, LRRN2, LIMK1, HUNK, GAB1, PPP2R5A, ARHGAP28, ANK2, DEK, DGKZ, MANF, DNM2, PLCXD3, CXCL11, TG, SFRP5, P2RX1, FGF18, SPARCL1, FGF13, TLR2 |
| apoptotic process | 22 | 0.007274 | CSRNP1, XBP1, DAPK1, GADD45A, GZMA, AHR, TNFAIP1, GHITM, SHB, SFRP2, ESPL1, PUF60, STK17A, SFRP5, P2RX1, GAS2, CASP2, CD14, PPID, ATG5, ATG4D, TLR2 |
| lipid metabolic process | 11 | 0.007515 | ACLY, PLCXD3, FABP6, CTH, LIPH, CPNE7, PLCG2, NPHP3, AOX1, B3GALT5, HSD17B10 |
| Notch signaling pathway | 8 | 0.007566 | NEURL1B, KRT19, NOTCH1, POFUT1, CNTN1, NKAP, ITGB1BP1, DTX4 |
| mitotic metaphase plate congression | 5 | 0.008524 | KIF18A, CCNB1, NUP62, KIF14, KIF2C |
| liver development | 7 | 0.008738 | XBP1, NOTCH1, ONECUT2, CITED2, SRD5A1, GNPNAT1, ACADM |
| protein phosphorylation | 19 | 0.008918 | PLK4, LTK, DAPK1, MAST2, LIMK1, HUNK, PIK3CD, CSF2RB, IQGAP3, CLK3, ERN2, CCNB1, OBSCN, STK17A, BTK, FNIP2, SGK2, MARK2, ATR |
| DNA replication | 8 | 0.009029 | RECQL4, FAM111B, DNAJC2, NASP, RMI1, DHX9, POLD2, ATR |
| cell proliferation | 10 | 0.010194 | MARCKSL1, LTK, ENPEP, LARP1, ATAD5, CITED2, SH2D2A, PES1, FGF18, NBN |
| Wnt signaling pathway | 10 | 0.013992 | SFRP2, CTNND2, TCF7, PLCG2, NPHP3, TAX1BP3, AMOTL2, BRD7, MARK2, WLS |
| positive regulation of cation channel activity | 3 | 0.01504 | KCNJ11, ANK2, CTSS |
| nucleotide biosynthetic process | 3 | 0.018151 | NMNAT1, ME1, NMNAT3 |
| positive regulation of viral genome replication | 4 | 0.019602 | NOTCH1, LARP1, PPID, TARBP2 |
| signal transduction in response to DNA damage | 3 | 0.021506 | ATAD5, GADD45A, NBN |
| telomere maintenance | 5 | 0.022698 | RECQL4, CCNE2, NBN, UCHL5, ATR |
| establishment or maintenance of cell polarity | 5 | 0.022698 | CAP1, SFRP5, FSCN1, NPHP3, PARVB |
| positive regulation of DNA replication | 4 | 0.023284 | BCAR3, ATAD5, DHX9, TNFAIP1 |
| protein homotetramerization | 5 | 0.026903 | CTH, ME1, MAT1A, HSD17B10, KCNJ2 |
| intracellular signal transduction | 16 | 0.028701 | DAPK1, MAST2, DGKA, HUNK, ADCY3, MASTL, TREM1, DGKZ, KCTD9, STK17A, ASB9, BTK, PLCG2, ITGB1BP1, SGK2, MARK2 |
| regulation of Rac protein signal transduction | 3 | 0.028912 | KBTBD6, ARHGAP17, DNM2 |
| maturation of LSU-rRNA from tricistronic rRNA transcript (SSU-rRNA, 5.8S rRNA, LSU-rRNA) | 3 | 0.028912 | DDX18, ZNHIT6, PES1 |
| platelet activation | 5 | 0.034882 | C1GALT1C1, DGKA, P2RX1, PLCG2, DGKZ |
| microtubule depolymerization | 3 | 0.037177 | KIF18A, STMN3, KIF2C |
| protein localization to M-band | 2 | 0.038163 | OBSCN, ANK2 |
| establishment or maintenance of cell polarity regulating cell shape | 2 | 0.038163 | PARVB, MARK2 |
| neuron projection development | 7 | 0.038903 | GPRIN2, ZFYVE27, CNTN1, STMN3, CNTN4, FRYL, MANF |
| response to xenobiotic stimulus | 10 | 0.044541 | BCAR3, ABCD3, SFRP2, KCNJ11, SRD5A1, BLMH, AHR, TYMS, ATR, ATG5 |
| cellular response to estradiol stimulus | 4 | 0.046869 | DDX18, KIF18A, SRD5A1, LCOR |
| positive regulation of interferon-beta production | 4 | 0.046869 | DHX9, POLR3C, POLR3D, TLR2 |
| hippocampus development | 5 | 0.050213 | NCOA1, SRD5A1, KIF14, FGF13, EZH2 |
| chromatin remodeling | 8 | 0.050622 | INO80C, SMARCE1, SUV39H2, DEK, HNRNPC, BRD7, UCHL5, EZH2 |
| dendritic spine morphogenesis | 3 | 0.051021 | DOCK10, CTNND2, EPHB1 |
| G1/S transition of mitotic cell cycle | 5 | 0.054539 | NASP, CCNE2, IQGAP3, EZH2, PIAS1 |
| centrosome cycle | 4 | 0.055573 | GADD45A, NUP62, HAUS3, PDE4DIP |
| iron ion transport | 3 | 0.055985 | HEPH, FTH1, SLC11A2 |
| angiogenesis | 10 | 0.056032 | XBP1, ENPEP, POFUT1, SH2D2A, FGF18, GAB1, AMOTL2, SHB, EPHB1, EPHB4 |
| cellular response to triacyl bacterial lipopeptide | 2 | 0.056697 | CD14, TLR2 |
| leukocyte differentiation | 2 | 0.056697 | TET2, TOX |
| positive regulation of viral translation | 2 | 0.056697 | DHX9, ATG5 |
| negative regulation of cell proliferation | 15 | 0.061659 | NOTCH1, LDOC1, CGRRF1, FGFRL1, MTBP, SFRP2, FABP6, SFRP5, FTH1, MMRN2, NUP62, TAX1BP3, ITGB1BP1, BRD7, TLR2 |
| protein autophosphorylation | 8 | 0.061692 | DAPK1, ULK3, BTK, EPHB1, EPHB4, MARK2, CLK3, ATR |
| peptidyl-serine phosphorylation | 8 | 0.061692 | DYRK4, MAST2, PBK, ULK3, MASTL, SGK2, MARK2, ATR |
| response to hypoxia | 8 | 0.063033 | CITED2, FUNDC1, SLC11A2, AGTRAP, PLAT, PLOD1, SLC2A8, TLR2 |
| actin cytoskeleton organization | 8 | 0.063033 | CAP1, GAS2L3, LIMK1, FSCN1, INPP5K, PDE4DIP, AMOTL2, PDLIM5 |
| regulation of RNA splicing | 5 | 0.063774 | FUS, ATXN7, ILDR1, CLK3, FAM50A |
| negative regulation of transcription, DNA-templated | 18 | 0.06506 | SMARCE1, ATF7IP, SUV39H2, NOTCH1, CITED2, TCF7, NKAP, AHR, PPHLN1, FOXP2, ERN2, SFRP2, ZNF639, TIMELESS, INPP5K, BRD7, LGR4, EZH2 |
| regulation of cell growth | 5 | 0.066203 | XBP1, KIF14, AGTR1, ATAD3A, SGK2 |
| proteolysis involved in cellular protein catabolic process | 4 | 0.068278 | PSMA3, CLPP, GZMA, CTSS |
| Fc-epsilon receptor signaling pathway | 3 | 0.071814 | BTK, PLCG2, MS4A2 |
| DNA unwinding involved in DNA replication | 3 | 0.071814 | RECQL4, GINS4, MCM3 |
| intestinal stem cell homeostasis | 2 | 0.074874 | LPCAT3, LGR4 |
| targeting of mRNA for destruction involved in RNA interference | 2 | 0.074874 | DHX9, TARBP2 |
| regulation of renal sodium excretion | 2 | 0.074874 | AGTR1, CORIN |
| mRNA cleavage involved in gene silencing | 2 | 0.074874 | DHX9, TARBP2 |
| positive regulation of mitochondrial ATP synthesis coupled electron transport | 2 | 0.074874 | CCNB1, GHITM |
| positive regulation of cell migration by vascular endothelial growth factor signaling pathway | 2 | 0.074874 | GAB1, PIK3CD |
| positive regulation of synoviocyte proliferation | 2 | 0.074874 | SAAL1, BTK |
| positive regulation of translation | 5 | 0.076391 | LARP1, KRT17, CPEB3, ELAVL1, TARBP2 |
| negative regulation of translation | 5 | 0.076391 | GRB7, LARP1, DAPK1, CPEB3, TYMS |
| mitotic cell cycle phase transition | 3 | 0.077375 | CCNB1, CCNE2, CCNG2 |
| hematopoietic stem cell proliferation | 3 | 0.077375 | SFRP2, NKAP, SHB |
| response to fatty acid | 3 | 0.077375 | ILDR1, PLAT, TLR2 |
| toll-like receptor signaling pathway | 3 | 0.077375 | PLCG2, CTSS, TLR2 |
| mitotic cell cycle | 7 | 0.077878 | PLK4, NUP62, PBK, MASTL, AZI2, NDC80, SKA1 |
| fatty acid biosynthetic process | 4 | 0.082171 | ACLY, XBP1, ABCD3, LIPH |
| regulation of cyclin-dependent protein serine/threonine kinase activity | 4 | 0.082171 | CCNB1, CCNE2, GADD45A, CCNG2 |
| regulation of cell cycle | 11 | 0.086355 | INO80C, ERN2, NOTCH1, CCNE2, GADD45A, CCNG2, PES1, TXLNG, NBN, MASTL, UCHL5 |
| response to toxic substance | 5 | 0.087318 | EPHX2, BLMH, AHR, TYMS, TLR2 |
| protein localization to plasma membrane | 7 | 0.09169 | DPP10, ZFYVE27, PALM, INPP5K, ITGB1BP1, ANK2, FGF13 |
| positive regulation of epithelial tube formation | 2 | 0.092702 | MMRN2, PIK3CD |
| centriole assembly | 2 | 0.092702 | RBM14, NUP62 |
| cellular response to diacyl bacterial lipopeptide | 2 | 0.092702 | CD14, TLR2 |
| positive regulation of centriole replication | 2 | 0.092702 | PLK4, NUP62 |
| regulation of cell proliferation | 7 | 0.09799 | CXCL11, TMIGD1, LTK, AGTR1, SGK2, EZH2, PIAS1 |
| lung development | 5 | 0.098956 | NOTCH1, FGF18, TIMELESS, NPHP3, SIM2 |

**Table S6.** Enrichment analysis of biological process of genes in midnight blue module

| **Biological process** | **Count** | ***p*-Value** | **Genes** |
| --- | --- | --- | --- |
| response to drug | 9 | 8.54E-04 | CENPF, HSP90AB1, BAD, SST, FPGS, PTPRM, XRCC1, PPARGC1A, KCNK3 |
| response to xenobiotic stimulus | 7 | 0.005939 | CENPF, HSP90AB1, BAD, SST, PTPRM, XRCC1, KCNK3 |
| ventricular system development | 3 | 0.006447 | CENPF, SEMA6D, MNAT1 |
| DNA replication | 5 | 0.009178 | POLA1, CHAF1B, POLD1, RPA3, CHTF18 |
| telomere maintenance via telomerase | 3 | 0.009564 | HSP90AB1, GAR1, POT1 |
| U1 snRNA 3'-end processing | 2 | 0.020118 | EXOSC9, EXOSC8 |
| U5 snRNA 3'-end processing | 2 | 0.020118 | EXOSC9, EXOSC8 |
| positive regulation of telomerase activity | 3 | 0.022037 | PKIB, HSP90AB1, POT1 |
| semaphorin-plexin signaling pathway | 3 | 0.023271 | SH3BP1, SEMA6D, SEMA3E |
| one-carbon metabolic process | 3 | 0.024533 | CA1, MTHFD1, FPGS |
| protein folding | 5 | 0.026195 | HSP90AB3P, HSP90AB1, HYOU1, HSP90B1, PDRG1 |
| nuclear polyadenylation-dependent mRNA catabolic process | 2 | 0.026734 | EXOSC9, EXOSC8 |
| regulation of cytokinesis | 3 | 0.032663 | SH3GLB1, PLK1, BRCA2 |
| nucleotide-excision repair | 3 | 0.034108 | RPA3, BRCA2, MNAT1 |
| sodium ion transmembrane transport | 4 | 0.035922 | SLC6A6, WNK1, SCN3B, SCN4B |
| negative regulation of leukocyte cell-cell adhesion | 2 | 0.039834 | WNK1, PPARA |
| GO:0046321~positive regulation of fatty acid oxidation | 2 | 0.039834 | PPARA, PPARGC1A |
| establishment of protein localization to telomere | 2 | 0.039834 | POT1, BRCA2 |
| nuclear polyadenylation-dependent tRNA catabolic process | 2 | 0.046319 | EXOSC9, EXOSC8 |
| nuclear polyadenylation-dependent rRNA catabolic process | 2 | 0.046319 | EXOSC9, EXOSC8 |
| positive regulation of sequence-specific DNA binding transcription factor activity | 4 | 0.046788 | TRIM52, FZD2, TRAF5, PPARGC1A |
| DNA repair | 6 | 0.049317 | POLA1, CHAF1B, POLD1, RPA3, BRCA2, MNAT1 |
| U4 snRNA 3'-end processing | 2 | 0.052759 | EXOSC9, EXOSC8 |
| exonucleolytic trimming to generate mature 3'-end of 5.8S rRNA from tricistronic rRNA transcript (SSU-rRNA, 5.8S rRNA, LSU-rRNA) | 2 | 0.059157 | EXOSC9, EXOSC8 |
| nuclear mRNA surveillance | 2 | 0.059157 | EXOSC9, EXOSC8 |
| protein stabilization | 5 | 0.062093 | HSP90AB3P, HSP90AB1, LAMP2, PPARGC1A, PDRG1 |
| ion transmembrane transport | 4 | 0.06453 | GABRA2, ANO10, KCNK3, CLCA4 |
| monocyte activation | 2 | 0.065512 | HYAL2, FOXP1 |
| nuclear-transcribed mRNA catabolic process, exonucleolytic, 3'-5' | 2 | 0.065512 | EXOSC9, EXOSC8 |
| cellular response to hypoxia | 4 | 0.069471 | BAD, HYOU1, PPARGC1A, KCNK3 |
| cellular response to tumor necrosis factor | 4 | 0.072739 | SMPD4, HYAL2, PPARGC1A, FOXP1 |
| membrane depolarization during cardiac muscle cell action potential | 2 | 0.078094 | SCN3B, SCN4B |
| positive regulation of smooth muscle cell proliferation | 3 | 0.08119 | MNAT1, PPARGC1A, FOXP1 |
| exonucleolytic nuclear-transcribed mRNA catabolic process involved in deadenylation-dependent decay | 2 | 0.084322 | EXOSC9, EXOSC8 |
| chloride transport | 3 | 0.085198 | GABRA2, ANO10, CLCA4 |
| mitotic cell cycle | 4 | 0.086376 | CENPF, CENPW, PLK1, E2F4 |
| inner cell mass cell proliferation | 2 | 0.090508 | SALL4, BRCA2 |
| negative regulation of cell growth involved in cardiac muscle cell development | 2 | 0.090508 | PPARA, FOXP1 |
| negative regulation of neuron apoptotic process | 4 | 0.091586 | NTRK2, HSP90AB1, SEMA3E, PPARGC1A |
| cellular response to starvation | 3 | 0.093388 | EHMT2, LAMP2, PPARA |
| negative regulation of glycolytic process | 2 | 0.096652 | PPARA, PPARGC1A |
| negative regulation of smooth muscle cell migration | 2 | 0.096652 | SEMA6D, PPARGC1A |
| positive regulation of ATP biosynthetic process | 2 | 0.096652 | PPARA, PPARGC1A |
| DNA synthesis involved in DNA repair | 2 | 0.096652 | POLA1, POLD1 |
| kinetochore assembly | 2 | 0.096652 | CENPF, CENPW |

**Table S7.** Enrichment analysis of selected miRNAs from green-yellow module

| **Function & Family** | **Count** | ***p*-value** | **miRNA** |
| --- | --- | --- | --- |
| Adipocyte Differentiation | 2 | 0.0208 | hsa-let-7b,hsa-mir-378a |
| Adipocyte Lipolysis | 1 | 0.0442 | hsa-mir-378a |
| Adiponectin Signaling | 2 | 1.70E-04 | hsa-mir-378a,hsa-mir-193b |
| Angiogenesis | 3 | 4.67E-03 | hsa-let-7b,hsa-mir-378a,hsa-mir-122 |
| Cell Proliferation | 7 | 3.11E-08 | hsa-let-7b,hsa-mir-124-2,hsa-mir-125b-1,hsa-mir-124-1,hsa-mir-378a,hsa-mir-125b-2,hsa-mir-124-3 |
| Cellular Senescence | 1 | 0.0388 | hsa-mir-378a |
| Cholesterol Efflux | 1 | 0.0815 | hsa-mir-378a |
| Cytoskeleton Remodeling | 1 | 0.0333 | hsa-mir-378a |
| Hematopoiesis | 4 | 1.73E-04 | hsa-let-7b,hsa-mir-125b-1,hsa-mir-378a,hsa-mir-125b-2 |
| Insulin Resistance | 2 | 4.16E-03 | hsa-mir-122,hsa-mir-378a |
| Lipid Metabolism | 2 | 0.0248 | hsa-mir-378a,hsa-mir-122 |
| Osteogenesis | 6 | 1.97E-07 | hsa-mir-124-2,hsa-mir-125b-1,hsa-mir-124-1,hsa-mir-378a,hsa-mir-125b-2,hsa-mir-124-3 |
| Vascular Homeostasis | 1 | 0.0657 | hsa-mir-378a |
| Wound Healing | 3 | 2.14E-04 | hsa-mir-125b-1,hsa-mir-378a,hsa-mir-125b-2 |
| Apoptosis | 2 | 0.116 | hsa-mir-193b,hsa-mir-122 |
| Inflammation | 7 | 3.38E-07 | hsa-mir-124-2,hsa-mir-193b,hsa-mir-125b-1,hsa-mir-124-3,hsa-mir-122,hsa-mir-125b-2,hsa-mir-124-1 |
| Peritoneal Cavity Homeostasis(26495316) | 1 | 0.1224 | hsa-mir-193b |
| Cell Cycle | 7 | 4.05E-08 | hsa-let-7b,hsa-mir-124-2,hsa-mir-125b-1,hsa-mir-124-1,hsa-mir-125b-2,hsa-mir-122,hsa-mir-124-3 |
| Cell Death | 3 | 7.81E-03 | hsa-let-7b,hsa-mir-125b-1,hsa-mir-125b-2 |
| Cell Differentiation | 6 | 1.43E-07 | hsa-let-7b,hsa-mir-124-2,hsa-mir-125b-1,hsa-mir-124-1,hsa-mir-125b-2,hsa-mir-124-3 |
| Folliculogenesis | 3 | 2.07E-05 | hsa-let-7b,hsa-mir-125b-1,hsa-mir-125b-2 |
| Glucose Metabolism | 6 | 1.75E-09 | hsa-let-7b,hsa-mir-124-2,hsa-mir-125b-1,hsa-mir-124-1,hsa-mir-125b-2,hsa-mir-124-3 |
| Immune Response | 2 | 0.091 | hsa-mir-125b-1,hsa-mir-125b-2 |
| Innate Immunity | 3 | 1.31E-03 | hsa-let-7b,hsa-mir-125b-1,hsa-mir-125b-2 |
| Latent Virus Replication | 4 | 1.17E-06 | hsa-mir-106b,hsa-mir-125b-1,hsa-mir-125b-2,hsa-mir-122 |
| Megakaryocyte Differentiation | 2 | 2.83E-04 | hsa-mir-125b-2,hsa-mir-125b-1 |
| Osteoblast Differentiation | 2 | 7.98E-03 | hsa-mir-125b-1,hsa-mir-125b-2 |
| Plasma Cell Differentiation | 2 | 7.84E-04 | hsa-mir-125b-1,hsa-mir-125b-2 |
| Regulation of Stem Cell | 7 | 2.84E-08 | hsa-mir-124-2,hsa-mir-106b,hsa-mir-125b-1,hsa-mir-124-1,hsa-mir-125b-2,hsa-mir-122,hsa-mir-124-3 |
| Tumor Suppressor MiRNAs | 7 | 6.98E-09 | hsa-let-7b,hsa-mir-124-2,hsa-mir-125b-1,hsa-mir-124-1,hsa-mir-125b-2,hsa-mir-122,hsa-mir-124-3 |
| Bile Duct Proliferation | 3 | 1.29E-07 | hsa-mir-124-2,hsa-mir-124-1,hsa-mir-124-3 |
| Brain Development | 4 | 2.74E-05 | hsa-mir-124-2,hsa-mir-106b,hsa-mir-124-1,hsa-mir-124-3 |
| Cell Division | 5 | 1.03E-08 | hsa-mir-124-2,hsa-mir-106b,hsa-let-7b,hsa-mir-124-1,hsa-mir-124-3 |
| Embryonic Development | 3 | 8.38E-05 | hsa-mir-124-2,hsa-mir-124-1,hsa-mir-124-3 |
| Epithelial-to-Mesenchymal Transition | 4 | 7.50E-04 | hsa-let-7b,hsa-mir-124-2,hsa-mir-124-1,hsa-mir-124-3 |
| Hormone-mediated Signaling Pathway | 3 | 3.37E-03 | hsa-mir-124-2,hsa-mir-124-1,hsa-mir-124-3 |
| Muscle Development | 3 | 1.62E-04 | hsa-mir-124-2,hsa-mir-124-1,hsa-mir-124-3 |
| Neuron Apoptosis | 3 | 5.64E-05 | hsa-mir-124-2,hsa-mir-124-1,hsa-mir-124-3 |
| Neuron Differentiation | 3 | 4.53E-05 | hsa-mir-124-2,hsa-mir-124-1,hsa-mir-124-3 |
| Osteoclast Differentiation | 3 | 4.53E-05 | hsa-mir-124-2,hsa-mir-124-1,hsa-mir-124-3 |
| Regulation of Wnt Signaling Pathway | 3 | 2.55E-06 | hsa-mir-124-2,hsa-mir-124-1,hsa-mir-124-3 |
| Smooth Muscle Cell Proliferation | 3 | 1.00E-04 | hsa-mir-124-2,hsa-mir-124-1,hsa-mir-124-3 |
| Transdifferentiation | 3 | 7.09E-06 | hsa-mir-124-2,hsa-mir-124-1,hsa-mir-124-3 |
| Adipogenesis | 1 | 0.1073 | hsa-mir-122 |
| Aging | 2 | 0.0463 | hsa-let-7b,hsa-mir-122 |
| Carbohydrate Metabolism | 1 | 0.0496 | hsa-mir-122 |
| Cardiac Remodeling | 1 | 0.0496 | hsa-mir-122 |
| Cholesterol Metabolism | 1 | 0.0442 | hsa-mir-122 |
| Circadian Rhythm | 1 | 0.1174 | hsa-mir-122 |
| Hepatic Stellate Cell Differentiation | 2 | 2.83E-04 | hsa-let-7b,hsa-mir-122 |
| Hepatotoxicity | 1 | 0.0333 | hsa-mir-122 |
| Stress Response | 1 | 0.0223 | hsa-mir-122 |
| Autophagy | 1 | 0.0442 | hsa-mir-106b |
| Immune System(Xiao's Cell2010) | 1 | 0.1124 | hsa-mir-106b |
| Mitochondrial Dysfunction | 1 | 0.0168 | hsa-mir-106b |
| Onco-MiRNAs | 1 | 0.1902 | hsa-mir-106b |
| Anti-Cell Proliferation(Hwang Etal Bjc2007) | 1 | 0.0442 | hsa-let-7b |
| Bone Regeneration | 1 | 0.1569 | hsa-let-7b |
| Pluripotent Stem Cells Reprogramming | 1 | 0.1073 | hsa-let-7b |
| T-Cell Differentiation | 1 | 0.0867 | hsa-let-7b |
| mir-378 family | 1 | 0.0279 | hsa-mir-378a |
| mir-193 family | 1 | 0.0112 | hsa-mir-193b |
| mir-10 family | 2 | 7.84E-04 | hsa-mir-125b-1,hsa-mir-125b-2 |
| mir-124 family | 3 | 1.29E-07 | hsa-mir-124-1,hsa-mir-124-2,hsa-mir-124-3 |
| mir-122 family | 1 | 0.0112 | hsa-mir-122 |
| mir-17 family | 1 | 0.0442 | hsa-mir-106b |
| let-7 family | 1 | 0.0657 | hsa-let-7b |

**Table S8.** Enrichment analysis of selected miRNAs from lightcyan module

| **Function & Family** | **Count** | ***p*-value** | **miRNA** |
| --- | --- | --- | --- |
| Dentinogenesis | 1 | 0.0101 | hsa-mir-665 |
| Epithelial-to-Mesenchymal Transition | 4 | 4.67E-04 | hsa-let-7b,hsa-mir-665,hsa-let-7e,hsa-mir-30b |
| Glucose Metabolism | 3 | 2.77E-04 | hsa-let-7b,hsa-let-7e,hsa-mir-484 |
| Aging | 3 | 3.06E-03 | hsa-let-7b,hsa-let-7e,hsa-mir-30b |
| Apoptosis | 1 | 0.4258 | hsa-mir-30b |
| Autophagy | 1 | 0.0399 | hsa-mir-30b |
| Cardiomyocyte Apoptosis | 1 | 0.035 | hsa-mir-30b |
| Cell Death | 3 | 5.65E-03 | hsa-let-7b,hsa-let-7e,hsa-mir-30b |
| Cell Motility | 1 | 0.1017 | hsa-mir-30b |
| Inflammation | 1 | 0.4442 | hsa-mir-30b |
| Innate Immunity | 3 | 9.35E-04 | hsa-let-7b,hsa-let-7e,hsa-mir-30b |
| Muscle Development | 1 | 0.1017 | hsa-mir-30b |
| Nephrotoxicity | 1 | 0.0831 | hsa-mir-30b |
| Peritoneal Cavity Homeostasis(26495316) | 1 | 0.1109 | hsa-mir-30b |
| Skeletal Muscle Cell Differentiation | 1 | 0.1063 | hsa-mir-30b |
| Tumor Suppressor MiRNAs | 3 | 3.35E-03 | hsa-let-7b,hsa-let-7e,hsa-mir-30b |
| Adipocyte Differentiation | 2 | 0.0169 | hsa-let-7b,hsa-let-7e |
| Anti-Cell Proliferation(Hwang Etal Bjc2007) | 2 | 6.29E-04 | hsa-let-7b,hsa-let-7e |
| Cell Differentiation | 2 | 0.0305 | hsa-let-7b,hsa-let-7e |
| Cell Proliferation | 2 | 0.0587 | hsa-let-7b,hsa-let-7e |
| Hematopoiesis | 2 | 0.0315 | hsa-let-7b,hsa-let-7e |
| Pancreas Development | 1 | 0.0151 | hsa-let-7e |
| T-Cell Differentiation | 2 | 2.64E-03 | hsa-let-7b,hsa-let-7e |
| Angiogenesis | 1 | 0.2855 | hsa-let-7b |
| Bone Regeneration | 1 | 0.1424 | hsa-let-7b |
| Cell Cycle | 1 | 0.3505 | hsa-let-7b |
| Cell Division | 1 | 0.0831 | hsa-let-7b |
| Folliculogenesis | 1 | 0.0545 | hsa-let-7b |
| Hepatic Stellate Cell Differentiation | 1 | 0.0251 | hsa-let-7b |
| Pluripotent Stem Cells Reprogramming | 1 | 0.0971 | hsa-let-7b |
| mir-30 family | 1 | 0.03 | hsa-mir-30b |
| let-7 family | 2 | 1.47E-03 | hsa-let-7b,hsa-let-7e |

**Table S9.** Enrichment analysis of selected miRNAs from midnight blue module

| **Function & Family** | **Count** | ***p*-value** | **miRNA** |
| --- | --- | --- | --- |
| mir-3689 family | 2 | 5.90E-04 | hsa-mir-3689d-1,hsa-mir-3689d-2 |
| mir-1233 family | 2 | 2.85E-05 | hsa-mir-1233-1,hsa-mir-1233-2 |
| mir-30 family | 1 | 0.0333 | hsa-mir-30c-1 |
| mir-130 family | 1 | 0.0223 | hsa-mir-130b |
| let-7 family | 1 | 0.0657 | hsa-let-7b |
| Dentinogenesis | 1 | 0.0112 | hsa-mir-665 |
| Epithelial-to-Mesenchymal Transition | 3 | 9.29E-03 | hsa-let-7b,hsa-mir-665,hsa-mir-30c-1 |
| Angiogenesis | 2 | 0.0491 | hsa-let-7b,hsa-mir-149 |
| DNA Synthesis | 1 | 0.0112 | hsa-mir-149 |
| Innate Immunity | 2 | 0.0218 | hsa-let-7b,hsa-mir-149 |
| Toll-Like Receptor Signaling Pathway | 1 | 0.0333 | hsa-mir-149 |
| Cell Death | 3 | 7.81E-03 | hsa-let-7b,hsa-mir-130b,hsa-mir-30c-1 |
| Cholesterol Homeostasis | 1 | 0.0496 | hsa-mir-30c-1 |
| Hematopoiesis | 2 | 0.0386 | hsa-let-7b,hsa-mir-30c-1 |
| T-helper 17 Cell Differentiation | 1 | 0.1022 | hsa-mir-30c-1 |
| Bone Regeneration | 2 | 0.0114 | hsa-let-7b,hsa-mir-130b |
| Cell Motility | 1 | 0.1124 | hsa-mir-130b |
| Embryonic Development | 1 | 0.0919 | hsa-mir-130b |
| Embryonic Stem Cell Differentiation | 1 | 0.1618 | hsa-mir-130b |
| Inflammation | 1 | 0.4794 | hsa-mir-130b |
| Nephrotoxicity | 1 | 0.0919 | hsa-mir-130b |
| Adipocyte Differentiation | 1 | 0.2087 | hsa-let-7b |
| Aging | 1 | 0.3036 | hsa-let-7b |
| Anti-Cell Proliferation(Hwang Etal Bjc2007) | 1 | 0.0442 | hsa-let-7b |
| Cell Cycle | 1 | 0.381 | hsa-let-7b |
| Cell Differentiation | 1 | 0.2746 | hsa-let-7b |
| Cell Division | 1 | 0.0919 | hsa-let-7b |
| Cell Proliferation | 1 | 0.3699 | hsa-let-7b |
| Folliculogenesis | 1 | 0.0604 | hsa-let-7b |
| Glucose Metabolism | 1 | 0.1472 | hsa-let-7b |
| Hepatic Stellate Cell Differentiation | 1 | 0.0279 | hsa-let-7b |
| Pluripotent Stem Cells Reprogramming | 1 | 0.1073 | hsa-let-7b |
| T-Cell Differentiation | 1 | 0.0867 | hsa-let-7b |
| Tumor Suppressor MiRNAs | 1 | 0.3118 | hsa-let-7b |

**Table S10.** Enrichment analysis of biological process of genes in green-yellow bipartite subnetwork

| **Biological process** | **Count** | ***p*-value** | **Genes** |
| --- | --- | --- | --- |
| macromolecular complex subunit organization | 11 | 0.002658 | BLM, GNL3L, MAX, CDK4, VMA21, GEMIN4, PMEPA1, TMEM9, KCTD12, ASCC3, EFNA5 |
| macromolecule modification | 16 | 0.003585 | GDF11, BLM, RPS6KL1, B4GALT1, USP10, EIF2AK1, EFNA5, SMAD5, GNL3L, CDK4, AAK1, PMEPA1, USP30, ASCC3, PLCB1, METAP2 |
| macromolecular complex assembly | 10 | 0.003996 | BLM, GNL3L, MAX, CDK4, VMA21, GEMIN4, PMEPA1, TMEM9, KCTD12, EFNA5 |
| cellular component biogenesis | 14 | 0.004187 | BLM, NEBL, MAX, KRI1, EFNA5, MYO1B, GNL3L, CDK4, VMA21, CDH11, GEMIN4, PMEPA1, TMEM9, KCTD12 |
| cellular response to organic cyclic compound | 6 | 0.004462 | BLM, CDK4, PMEPA1, PLCB1, EFNA5, SMAD5 |
| protein complex biogenesis | 8 | 0.005003 | BLM, GNL3L, CDK4, VMA21, PMEPA1, TMEM9, KCTD12, EFNA5 |
| protein complex assembly | 8 | 0.005003 | BLM, GNL3L, CDK4, VMA21, PMEPA1, TMEM9, KCTD12, EFNA5 |
| protein phosphorylation | 10 | 0.005915 | GDF11, BLM, RPS6KL1, CDK4, EIF2AK1, AAK1, PMEPA1, PLCB1, EFNA5, SMAD5 |
| protein modification process | 15 | 0.006135 | GDF11, BLM, RPS6KL1, B4GALT1, USP10, EIF2AK1, EFNA5, SMAD5, GNL3L, CDK4, AAK1, PMEPA1, USP30, PLCB1, METAP2 |
| cellular protein modification process | 15 | 0.006135 | GDF11, BLM, RPS6KL1, B4GALT1, USP10, EIF2AK1, EFNA5, SMAD5, GNL3L, CDK4, AAK1, PMEPA1, USP30, PLCB1, METAP2 |
| cellular component assembly | 13 | 0.006153 | BLM, NEBL, MAX, EFNA5, MYO1B, GNL3L, CDK4, VMA21, CDH11, GEMIN4, PMEPA1, TMEM9, KCTD12 |
| phosphate-containing compound metabolic process | 13 | 0.007516 | GDF11, BLM, RPS6KL1, SLC20A1, EIF2AK1, EFNA5, PAICS, SMAD5, RPIA, CDK4, AAK1, PMEPA1, PLCB1 |
| cellular response to ionomycin | 2 | 0.008798 | CDK4, PLCB1 |
| response to ionomycin | 2 | 0.008798 | CDK4, PLCB1 |
| phosphorus metabolic process | 13 | 0.009422 | GDF11, BLM, RPS6KL1, SLC20A1, EIF2AK1, EFNA5, PAICS, SMAD5, RPIA, CDK4, AAK1, PMEPA1, PLCB1 |
| response to organic cyclic compound | 7 | 0.009804 | BLM, CDK4, PMAIP1, PMEPA1, PLCB1, EFNA5, SMAD5 |
| protein complex subunit organization | 8 | 0.009895 | BLM, GNL3L, CDK4, VMA21, PMEPA1, TMEM9, KCTD12, EFNA5 |
| cellular response to ether | 2 | 0.012296 | CDK4, PLCB1 |
| monosaccharide metabolic process | 4 | 0.014598 | RPIA, B4GALT1, PPP1R3D, PMAIP1 |
| proton-transporting V-type ATPase complex assembly | 2 | 0.015783 | VMA21, TMEM9 |
| cellular component organization or biogenesis | 20 | 0.019196 | BLM, B4GALT1, NEBL, MAX, KRI1, EFNA5, MYO1B, GNL3L, CDK4, VMA21, CDH11, AAK1, GEMIN4, PMEPA1, PMAIP1, TMEM9, KCTD12, USP30, ASCC3, PLCB1 |
| phosphorylation | 10 | 0.019807 | GDF11, BLM, RPS6KL1, CDK4, EIF2AK1, AAK1, PMEPA1, PLCB1, EFNA5, SMAD5 |
| cellular response to hormone stimulus | 5 | 0.024069 | MAX, CDK4, PMEPA1, PLCB1, EFNA5 |
| cellular protein metabolic process | 17 | 0.025336 | GDF11, BLM, RPS6KL1, B4GALT1, USP10, EIF2AK1, EFNA5, SMAD5, GNL3L, CDK4, AAK1, PMEPA1, PMAIP1, USP30, ASCC3, PLCB1, METAP2 |
| G2/M transition of mitotic cell cycle | 3 | 0.025968 | BLM, CDK4, PLCB1 |
| response to ether | 2 | 0.02617 | CDK4, PLCB1 |
| cellular response to lipid | 5 | 0.026491 | HADHB, CDK4, PMEPA1, PLCB1, EFNA5 |
| proton-transporting two-sector ATPase complex assembly | 2 | 0.029608 | VMA21, TMEM9 |
| regulation of acrosome reaction | 2 | 0.031323 | B4GALT1, PLCB1 |
| cellular response to endogenous stimulus | 7 | 0.031828 | BLM, MAX, CDK4, PMEPA1, PLCB1, EFNA5, SMAD5 |
| cell cycle G2/M phase transition | 3 | 0.031983 | BLM, CDK4, PLCB1 |
| cellular component organization | 19 | 0.032081 | BLM, B4GALT1, NEBL, MAX, EFNA5, MYO1B, GNL3L, CDK4, VMA21, CDH11, AAK1, GEMIN4, PMEPA1, PMAIP1, TMEM9, KCTD12, USP30, ASCC3, PLCB1 |
| protein metabolic process | 18 | 0.032838 | GDF11, BLM, RPS6KL1, B4GALT1, USP10, EIF2AK1, EFNA5, SMAD5, GNL3L, CDK4, AAK1, PMEPA1, PMAIP1, TMEM9, USP30, ASCC3, PLCB1, METAP2 |
| regulation of cell communication | 12 | 0.041263 | GDF11, CDK4, USP10, SLC20A1, CDH11, AAK1, PMAIP1, PMEPA1, TMEM9, PLCB1, EFNA5, TMEM9B |
| regulation of signaling | 12 | 0.043374 | GDF11, CDK4, USP10, SLC20A1, CDH11, AAK1, PMAIP1, PMEPA1, TMEM9, PLCB1, EFNA5, TMEM9B |
| response to starvation | 3 | 0.056027 | MAX, EIF2AK1, PMAIP1 |
| regulation of fertilization | 2 | 0.056697 | B4GALT1, PLCB1 |
| cellular response to oxygen-containing compound | 6 | 0.059757 | HADHB, BLM, MAX, CDK4, PLCB1, EFNA5 |
| single-organism carbohydrate metabolic process | 4 | 0.059757 | RPIA, B4GALT1, PPP1R3D, PMAIP1 |
| epithelial cell development | 3 | 0.069325 | GDF11, B4GALT1, PLCB1 |
| small molecule metabolic process | 8 | 0.070848 | MRS2, RPIA, HADHB, B4GALT1, PPP1R3D, PMAIP1, PLCB1, PAICS |
| cellular response to organic substance | 9 | 0.072056 | HADHB, BLM, MAX, CDK4, USP10, PMEPA1, PLCB1, EFNA5, SMAD5 |
| hexose metabolic process | 3 | 0.072299 | B4GALT1, PPP1R3D, PMAIP1 |
| response to hormone | 5 | 0.07249 | MAX, CDK4, PMEPA1, PLCB1, EFNA5 |
| positive regulation of signal transduction | 7 | 0.072827 | GDF11, SLC20A1, AAK1, PMAIP1, TMEM9, PLCB1, TMEM9B |
| catabolic process | 9 | 0.076849 | HADHB, CDK4, USP10, PPP1R3D, PMAIP1, TMEM9, USP30, ASCC3, PLCB1 |
| regulation of catabolic process | 5 | 0.077005 | CDK4, USP10, PPP1R3D, TMEM9, USP30 |
| regulation of protein metabolic process | 11 | 0.0773 | GDF11, BLM, GNL3L, CDK4, EIF2AK1, PMAIP1, PMEPA1, TMEM9, ASCC3, PLCB1, EFNA5 |
| of I-kappaB kinase/NF-kappaB signaling | 3 | 0.084074 | USP10, SLC20A1, TMEM9B |
| I-kappaB kinase/NF-kappaB signaling | 3 | 0.08777 | USP10, SLC20A1, TMEM9B |
| response to endogenous stimulus | 7 | 0.090056 | BLM, MAX, CDK4, PMEPA1, PLCB1, EFNA5, SMAD5 |
| cellular response to chemical stimulus | 10 | 0.092473 | HADHB, BLM, MAX, CDK4, USP10, PMAIP1, PMEPA1, PLCB1, EFNA5, SMAD5 |
| cellular response to organonitrogen compound | 4 | 0.093946 | BLM, MAX, CDK4, PLCB1 |
| enzyme linked receptor protein signaling pathway | 5 | 0.098649 | GDF11, PMEPA1, PLCB1, EFNA5, SMAD5 |

**Table S11.** Enrichment analysis of biological process of genes in lightcyan bipartite subnetwork

| **Biological process** | **Count** | ***p*-value** | **Genes** |
| --- | --- | --- | --- |
| establishment or maintenance of cell polarity regulating cell shape | 3 | 2.58E-05 | KIF3A, PARVB, MARK2 |
| regulation of cell morphogenesis | 6 | 0.01651 | CUX1, KIF3A, PARVB, PDLIM5, MARK2, DNM2 |
| positive regulation of receptor-mediated endocytosis | 3 | 0.017307 | KIF3A, PLCG2, DNM2 |
| protein stabilization | 4 | 0.027402 | ATF7IP, CRTAP, HPS4, WIZ |
| regulation of DNA metabolic process | 6 | 0.029713 | ATF7IP, NMNAT1, TIMELESS, WIZ, TNFAIP1, HNRNPC |
| sulfur amino acid catabolic process | 2 | 0.034959 | BLMH, MAT1A |
| GO:0007283~spermatogenesis | 6 | 0.03633 | PIWIL1, CRTAP, SPATA5, TARBP2, DNM2, PIAS1 |
| male gamete generation | 6 | 0.03719 | PIWIL1, CRTAP, SPATA5, TARBP2, DNM2, PIAS1 |
| positive regulation of sodium ion transmembrane transporter activity | 2 | 0.051985 | CNKSR3, DNM2 |
| dendrite morphogenesis | 3 | 0.05218 | CUX1, SLC11A2, PDLIM5 |
| positive regulation of ion transmembrane transporter activity | 3 | 0.05293 | CNKSR3, PLCG2, DNM2 |
| regulation of receptor-mediated endocytosis | 3 | 0.055203 | KIF3A, PLCG2, DNM2 |
| positive regulation of transporter activity | 3 | 0.060639 | CNKSR3, PLCG2, DNM2 |
| positive regulation of sodium ion transmembrane transport | 2 | 0.065948 | CNKSR3, DNM2 |
| cell cycle | 10 | 0.068494 | PIWIL1, TIMELESS, TET2, PLCG2, HAUS3, TXLNG, WIZ, AHR, DNM2, PIAS1 |
| cellular response to nitrogen compound | 6 | 0.068606 | SYAP1, TIMELESS, AGTRAP, AHR, TARBP2, DNM2 |
| regulation of DNA replication | 3 | 0.069533 | TIMELESS, WIZ, TNFAIP1 |
| regulation of cell morphogenesis involved in differentiation | 4 | 0.069549 | CUX1, PDLIM5, MARK2, DNM2 |
| cellular component organization or biogenesis | 28 | 0.07021 | PIWIL1, COPS7B, ARHGAP17, TNFAIP1, GHITM, CUX1, KIF3A, PES1, PLCG2, PDLIM5, MARK2, DNAJC19, ATF7IP, UTP6, CRTAP, TMEM30B, SLC11A2, TET2, HPS4, HAUS3, PARVB, MAT1A, TARBP2, PIAS1, DNM2, NMNAT1, ZNF639, HNRNPC |
| cell morphogenesis involved in differentiation | 6 | 0.07081 | CUX1, SLC11A2, PARVB, PDLIM5, MARK2, DNM2 |
| regulation of Rac protein signal transduction | 2 | 0.071476 | ARHGAP17, DNM2 |
| positive regulation of DNA metabolic process | 4 | 0.072125 | ATF7IP, TIMELESS, WIZ, TNFAIP1 |
| regulation of protein stability | 4 | 0.077405 | ATF7IP, CRTAP, HPS4, WIZ |
| gamete generation | 6 | 0.077655 | PIWIL1, CRTAP, SPATA5, TARBP2, DNM2, PIAS1 |
| regulation of cellular component organization | 14 | 0.078235 | ATF7IP, HPS4, ARHGAP17, PARVB, GHITM, DNM2, NMNAT1, CUX1, KIF3A, ZNF639, PLCG2, HNRNPC, PDLIM5, MARK2 |
| protein hydroxylation | 2 | 0.079708 | CRTAP, PLOD1 |
| regulation of cell shape | 3 | 0.082298 | KIF3A, PARVB, MARK2 |
| cell morphogenesis | 7 | 0.085123 | CUX1, KIF3A, SLC11A2, PARVB, PDLIM5, MARK2, DNM2 |
| organic substance catabolic process | 11 | 0.08871 | FOXRED2, NMNAT1, CLPP, LIPH, TET2, PLCG2, BLMH, TNFAIP1, MAT1A, PGPEP1, PIAS1 |
| mitochondrion organization | 5 | 0.090234 | DNAJC19, HPS4, GHITM, MARK2, DNM2 |
| positive regulation of endocytosis | 3 | 0.090279 | KIF3A, PLCG2, DNM2 |
| negative regulation of DNA metabolic process | 3 | 0.092988 | NMNAT1, TIMELESS, HNRNPC |
| positive regulation of cation transmembrane transport | 3 | 0.096638 | CNKSR3, PLCG2, DNM2 |

**Table S12.** Enrichment analysis of biological process of genes in midnight blue bipartite subnetwork

| **Biological process** | **Count** | ***p*-value** | **Genes** |
| --- | --- | --- | --- |
| regulation of protein stability | 5 | 5.19E-04 | SH3GLB1, LAMP2, PLK1, PPARGC1A, PDRG1 | |
| response to starvation | 4 | 0.001856 | SH3GLB1, LAMP2, PPARA, PPARGC1A | |
| positive regulation of cellular catabolic process | 4 | 0.010711 | SH3GLB1, PLK1, ZC3HAV1, PPARA | |
| negative regulation of molecular function | 6 | 0.011182 | IRAK2, ZCCHC9, PLK1, PPARA, PPP1R12C, PPARGC1A | |
| cellular response to starvation | 3 | 0.016476 | SH3GLB1, LAMP2, PPARA | |
| positive regulation of ATP biosynthetic process | 2 | 0.017007 | PPARA, PPARGC1A | |
| positive regulation of catabolic process | 4 | 0.017226 | SH3GLB1, PLK1, ZC3HAV1, PPARA | |
| negative regulation of glycolytic process | 2 | 0.018131 | PPARA, PPARGC1A | |
| positive regulation of fatty acid oxidation | 2 | 0.018131 | PPARA, PPARGC1A | |
| regulation of catabolic process | 5 | 0.018962 | SH3GLB1, PLK1, ZC3HAV1, PPARA, PPARGC1A | |
| negative regulation of cofactor metabolic process | 2 | 0.020375 | PPARA, PPARGC1A | |
| negative regulation of coenzyme metabolic process | 2 | 0.020375 | PPARA, PPARGC1A | |
| positive regulation of gluconeogenesis | 2 | 0.020375 | PPARA, PPARGC1A | |
| response to nutrient levels | 4 | 0.021854 | SH3GLB1, LAMP2, PPARA, PPARGC1A | |
| regulation of molecular function | 9 | 0.023144 | FZD2, IRAK2, ZCCHC9, PLK1, SCN3B, PPARA, PPP1R12C, PPARGC1A, KCNK3 | |
| response to extracellular stimulus | 4 | 0.025326 | SH3GLB1, LAMP2, PPARA, PPARGC1A | |
| protein stabilization | 3 | 0.025831 | LAMP2, PPARGC1A, PDRG1 | |
| regulation of ATP biosynthetic process | 2 | 0.027079 | PPARA, PPARGC1A | |
| organic substance catabolic process | 7 | 0.027255 | SH3GLB1, LAMP2, PLK1, ZC3HAV1, DCAF11, PPARA, PPARGC1A | |
| negative regulation of phosphate metabolic process | 4 | 0.028085 | ZCCHC9, PLK1, PPARA, PPARGC1A | |
| negative regulation of phosphorus metabolic process | 4 | 0.028209 | ZCCHC9, PLK1, PPARA, PPARGC1A | |
| cellular response to nutrient levels | 3 | 0.02941 | SH3GLB1, LAMP2, PPARA | |
| cellular catabolic process | 7 | 0.033319 | SH3GLB1, LAMP2, PLK1, ZC3HAV1, DCAF11, PPARA, PPARGC1A | |
| negative regulation of ATP metabolic process | 2 | 0.035948 | PPARA, PPARGC1A | |
| establishment of localization | 11 | 0.036331 | SH3GLB1, SLC6A6, RSRC1, AQP8, LAMP2, PLK1, ZDHHC24, SCN3B, PPARA, PPARGC1A, KCNK3 | |
| cellular response to extracellular stimulus | 3 | 0.037124 | SH3GLB1, LAMP2, PPARA | |
| positive regulation of sequence-specific DNA binding transcription factor activity | 3 | 0.038649 | FZD2, IRAK2, PPARGC1A | |
| regulation of fatty acid oxidation | 2 | 0.041453 | PPARA, PPARGC1A | |
| positive regulation of fatty acid metabolic process | 2 | 0.043646 | PPARA, PPARGC1A | |
| regulation of ion transmembrane transporter activity | 3 | 0.044715 | SCN3B, PPARGC1A, KCNK3 | |
| regulation of transmembrane transporter activity | 3 | 0.047735 | SCN3B, PPARGC1A, KCNK3 | |
| positive regulation of glucose metabolic process | 2 | 0.049108 | PPARA, PPARGC1A | |
| regulation of cellular catabolic process | 4 | 0.052776 | SH3GLB1, PLK1, ZC3HAV1, PPARA | |
| positive regulation of ATP metabolic process | 2 | 0.054541 | PPARA, PPARGC1A | |
| regulation of ion transport | 4 | 0.055034 | SCN3B, PPARA, PPARGC1A, KCNK3 | |
| response to hypoxia | 3 | 0.056045 | PPARA, PPARGC1A, KCNK3 | |
| regulation of transporter activity | 3 | 0.056932 | SCN3B, PPARGC1A, KCNK3 | |
| regulation of glycolytic process | 2 | 0.057786 | PPARA, PPARGC1A | |
| cochlea development | 2 | 0.058865 | FZD2, KCNK3 | |
| cellular response to external stimulus | 3 | 0.059625 | SH3GLB1, LAMP2, PPARA | |
| macromolecule catabolic process | 5 | 0.059636 | SH3GLB1, LAMP2, PLK1, ZC3HAV1, DCAF11 | |
| regulation of gluconeogenesis | 2 | 0.059944 | PPARA, PPARGC1A | |
| response to decreased oxygen levels | 3 | 0.060835 | PPARA, PPARGC1A, KCNK3 | |
| negative regulation of purine nucleotide metabolic process | 2 | 0.062097 | PPARA, PPARGC1A | |
| negative regulation of nucleotide metabolic process | 2 | 0.063171 | PPARA, PPARGC1A | |
| negative regulation of cellular carbohydrate metabolic process | 2 | 0.064245 | PPARA, PPARGC1A | |
| catabolic process | 7 | 0.064736 | SH3GLB1, LAMP2, PLK1, ZC3HAV1, DCAF11, PPARA, PPARGC1A | |
| regulation of carbohydrate catabolic process | 2 | 0.069595 | PPARA, PPARGC1A | |
| positive regulation of cellular carbohydrate metabolic process | 2 | 0.070661 | PPARA, PPARGC1A | |
| negative regulation of carbohydrate metabolic process | 2 | 0.070661 | PPARA, PPARGC1A | |
| response to oxygen levels | 3 | 0.071146 | PPARA, PPARGC1A, KCNK3 | |
| regulation of coenzyme metabolic process | 2 | 0.071726 | PPARA, PPARGC1A | |
| transport | 10 | 0.072635 | SH3GLB1, SLC6A6, RSRC1, AQP8, LAMP2, ZDHHC24, SCN3B, PPARA, PPARGC1A, KCNK3 | |
| regulation of cation transmembrane transport | 3 | 0.073728 | SCN3B, PPARGC1A, KCNK3 | |
| positive regulation of nucleotide biosynthetic process | 2 | 0.074915 | PPARA, PPARGC1A | |
| positive regulation of purine nucleotide biosynthetic process | 2 | 0.074915 | PPARA, PPARGC1A | |
| gluconeogenesis | 2 | 0.075976 | PPARA, PPARGC1A | |
| circadian regulation of gene expression | 2 | 0.078094 | PPARA, PPARGC1A | |
| hexose biosynthetic process | 2 | 0.079151 | PPARA, PPARGC1A | |
| cellular response to stress | 6 | 0.080717 | SH3GLB1, LAMP2, PLK1, PPARA, PPARGC1A, KCNK3 | |
| regulation of cofactor metabolic process | 2 | 0.081262 | PPARA, PPARGC1A | |
| monosaccharide biosynthetic process | 2 | 0.083368 | PPARA, PPARGC1A | |
| protein localization to vacuole | 2 | 0.08547 | SH3GLB1, LAMP2 | |
| regulation of biological quality | 9 | 0.085881 | SH3GLB1, ADH1B, LAMP2, PLK1, SCN3B, PPARA, PPARGC1A, KCNK3, PDRG1 | |
| glycolytic process | 2 | 0.09279 | PPARA, PPARGC1A | |
| ATP generation from ADP | 2 | 0.093831 | PPARA, PPARGC1A | |
| negative regulation of apoptotic process | 4 | 0.094308 | PTRH2, PLK1, PPARA, PPARGC1A | |
| regulation of sequence-specific DNA binding transcription factor activity | 3 | 0.094729 | FZD2, IRAK2, PPARGC1A | |
| positive regulation of carbohydrate metabolic process | 2 | 0.095909 | PPARA, PPARGC1A | |
| negative regulation of receptor activity | 2 | 0.095909 | PPARA, PPARGC1A | |
| transmembrane transport | 5 | 0.098617 | SLC6A6, AQP8, SCN3B, PPARGC1A, KCNK3 | |
| cation transmembrane transport | 4 | 0.098874 | SLC6A6, SCN3B, PPARGC1A, KCNK3 | |
| positive regulation of lipid biosynthetic process | 2 | 0.099019 | PPARA, PPARGC1A | |
| negative regulation of programmed cell death | 4 | 0.099335 | PTRH2, PLK1, PPARA, PPARGC1A | |

**Table S13.** The hub drug-gene network extracted from the DGIdb database with high degree

| **Drug** | **Degree** |
| --- | --- |
| METHOTREXATE | 9 |
| CISPLATIN | 9 |
| CYCLOPHOSPHAMIDE | 8 |
| DEXAMETHASONE | 8 |
| BORTEZOMIB | 7 |
| DIPYRIDAMOLE | 7 |
| CYTARABINE | 6 |
| DOXORUBICIN | 6 |
| FLUOROURACIL | 6 |
| DISULFIRAM | 6 |
| LEVODOPA | 5 |
| METHYLDOPA | 5 |
| SIMVASTATIN | 5 |
| TRETINOIN | 5 |
| HYDRALAZINE | 5 |
| DAUNORUBICIN HYDROCHLORIDE | 5 |
| PROGESTERONE | 5 |
| DAUNORUBICIN | 5 |
| OLANZAPINE | 5 |
| NICLOSAMIDE | 5 |
| IDARUBICIN | 5 |
